# Supplementary material for: The human PMR1 endonuclease stimulates cell motility by down regulating miR-200 family microRNAs
Source: PubMed Central journal article supplement — Nucleic Acids Res. 2016 Jun 1;44(12):5811–9. doi: 10.1093/nar/gkw497 (PMC4937341; doi:10.1093/nar/gkw497), 2016-06-01
Supplement: supp_gkw497_nar-00635-a-2016-File008.pdf [file supp_gkw497_nar-00635-a-2016-File008.pdf]

## **Supplemental Material**

**Gu, S.-Q., Gallego-Perez, D., McClory, S.P., Shi, J., Han, J., Lee, L.J. and Schoenberg, D.R.**

**The human PMR1 endonuclease stimulates cell motility by down regulating miR-200 family microRNAs**

### **Supplemental Materials and Methods**

**Figure S1. Protocol for generating biomimetic micropatterned polydimethylsiloxane matrices.**

**Figure S2. Concentration-dependent changes in miR-200 target gene expression.**

**Figure S3. hPMR1-mediated changes in miR-141 and miR-200 target mRNAs.**

**Figure S4. hPMR1 cleaves within the apical loop of pre-miR-200c.**

**Table S1. Primers used for RT-qPCR of hPMR1 and miR-200 target mRNAs.**

**Table S2. Primers used to generate pre-miR-200c transcripts.**

**Video S1. Single cell analysis of MCF-7 cells expressing active hPMR1.avi**

## Supplemental Materials and Methods

### ***In vitro* analysis of hPMR1 activity against pre-miR-200c** (related to Supplemental Fig. S4).

Fluorescent forms of pre-miR-200c or pre-miR-200c bearing mutations in the apical loop YUGA element (U34A, G35C) were generated by *in vitro* transcription with T7 RNA polymerase (MEGAscript® T7 transcription Kit, Ambion). The DNA templates were prepared using primer pairs in Supplement Table S2 and gel purified. For *in vitro* transcription, each 20 µl reaction contained 0.5 mM ATP, CTP, GTP, 0.1mM UTP and 10 µM aminoallyl-UTP-ATTO-680 (Jena Bioscience), 5 µl template, 2 µl enzyme mix. Transcripts were then purified on 20% polyacrylamide/8M urea gels prior to use. The C-terminal biotinylation tag on hPMR1 was used to recover protein for activity assay. Dynabeads MyOne Streptavidin T1 (Invitrogen) were preincubated in 100mM NaOH and 50mM NaCl for 2 min, washed with 100 mM NaCl and PBS. These were incubated with gentle rotation for 30 min at 25°C with 100 µg of cytoplasmic extract from uninduced or doxycycline-treated cells in a 200 µl volume. Beads was washed 3-times with 20 mM Tris-HCl, pH 7.5, 1.5 mM MgCl<sub>2</sub>, 25 mM NaCl, 1% glycerol and 1 mM DTT, and suspended in 50 µl of the same buffer followed by addition of 1 µl of pre-miR-200C. The reaction mixture was incubated with constant agitation for 60 min at 37°C, after which the beads were removed. 20 µl of the reaction was mixed with an equal volume of 95% deionized formamide/5 mM EDTA and separated on 20% polyacrylamide/8M urea gels. The gels were visualized directly on LI-COR Odyssey imaging system.

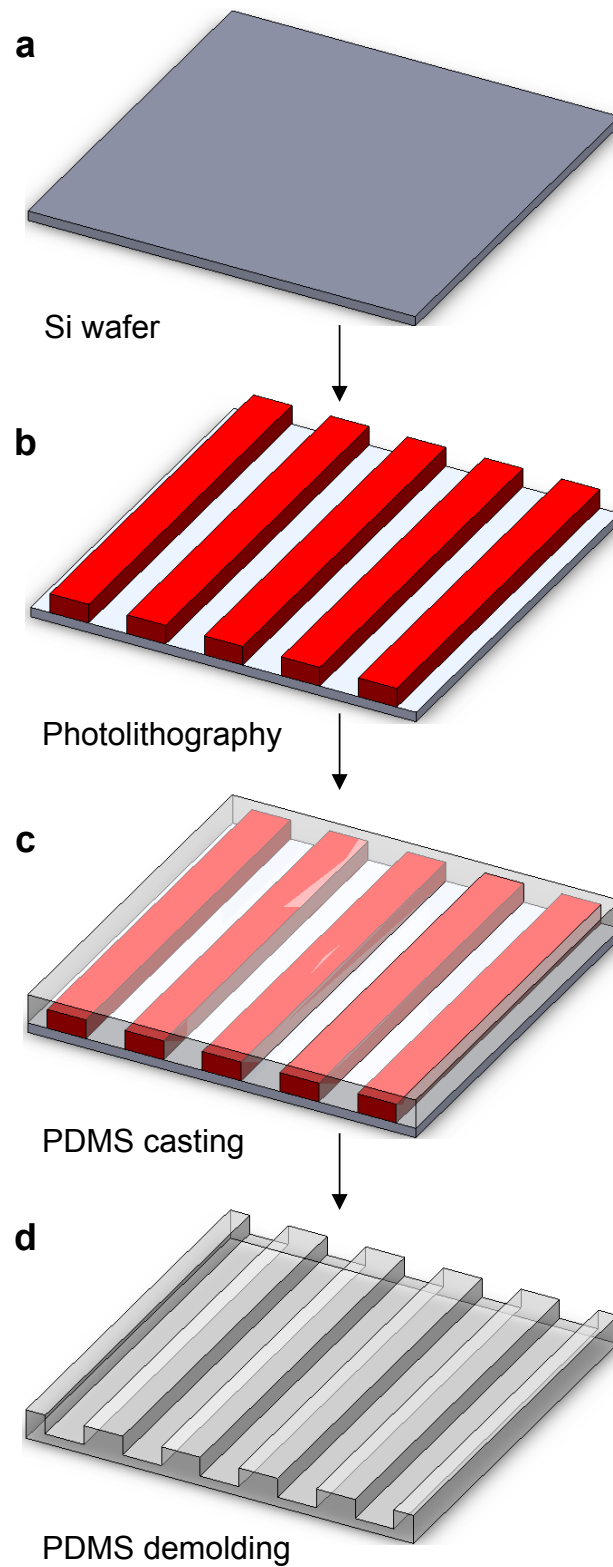

**Figure S1. Protocol for generating biomimetic micropatterned polydimethylsiloxane matrices. (a)** Silicon wafer. **(b)** Microscale lines are patterned on the surface via standard photolithography. **(c)** PDMS:curing agent mixture (10:1) is cast on the patterned wafer surface and allowed to cure. **(d)** Textured PDMS is demolded and readied for cell migration experiments.

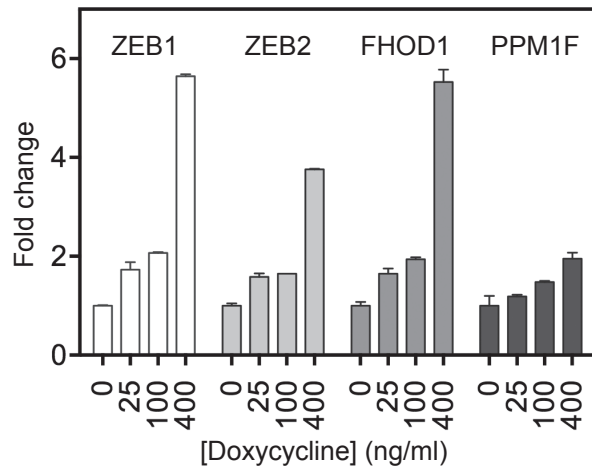

**Figure S2. Concentration-dependent changes in miR-200 target gene expression.** MCF-7 cells carrying an inducible hPMR1 transgene were treated for 24 hr with the indicated concentrations of doxycycline. Cytoplasmic RNA recovered from each culture was analyzed by RT-qPCR for ZEB1, ZEB2, FHOD1 and PPM1F, and the results were normalized to RPLP0 mRNA. Results are presented as fold-increase over uninduced cells and represent the mean  $\pm$  standard deviation (n=6).

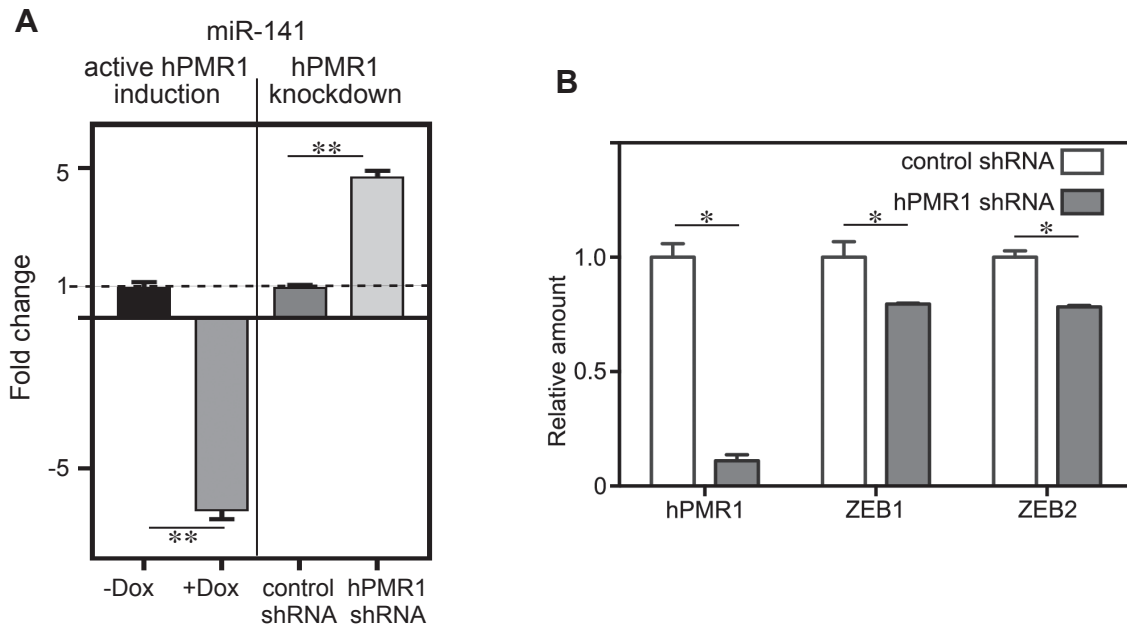

**Figure S3. hPMR1-mediated changes in miR-141 and miR-200 target mRNAs. A.** Taqman assay for miR-141 was performed on cytoplasmic RNA from uninduced and doxycycline-treated MCF-7 cells carrying the active hPMR1 transgene (left label) and on cytoplasmic RNA of MCF-7 cells that were transduced with lentivirus expressing control or hPMR1 shRNAs. The data were normalized to RNU48 and represent the mean  $\pm$  standard deviation (n=3). The double asterisk (\*\*) indicates  $p < .0001$  by Student's T-test. **B.** Cytoplasmic RNA from MCF-7 cells expressing control or hPMR1 shRNA was analyzed by RT-qPCR for hPMR1, ZEB1 or ZEB2, and normalized to RPLP0 mRNA. The asterisk (\*) indicates  $p < .05$  by Student's T-test. The results are presented as the amount relative to control shRNA and represent the mean  $\pm$  standard deviation (n=3).

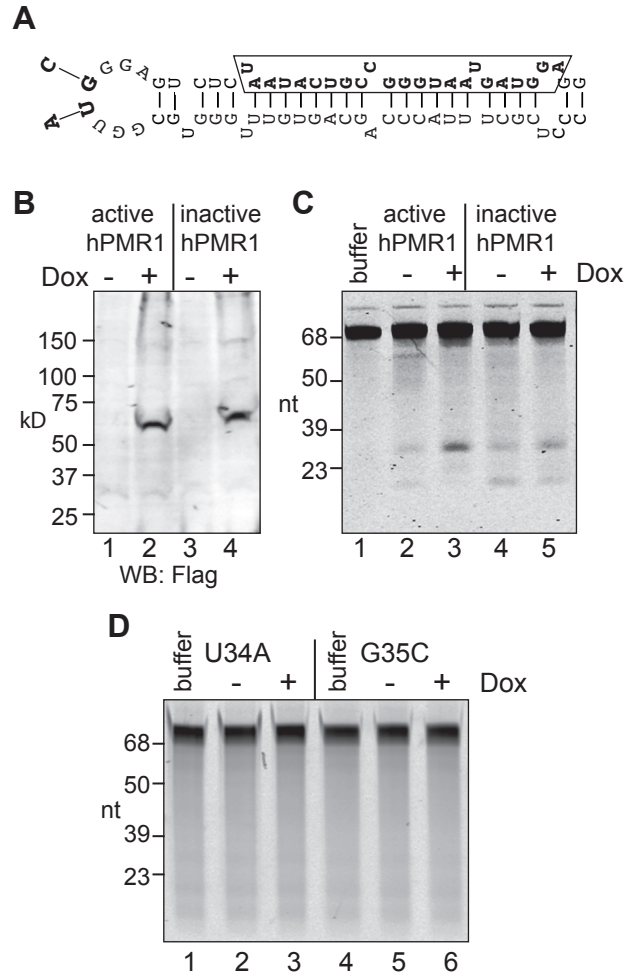

**Figure S4. hPMR1 cleaves within the apical loop of pre-miR-200c.** **A.** The secondary structure of pre-miR-200c is shown with the mature microRNA indicated by the box and the cleavage site UG dinucleotides identified along with mutations that inactivate cleavage. **B.** The induction of active and inactive hPMR1 was confirmed by Western blotting with anti-FLAG antibody after 24 hr treatment  $\pm$  doxycycline. **C.** Cytoplasmic extracts from uninduced and induced MCF-7 cells were bound to streptavidin paramagnetic beads which were then washed to remove unbound protein. Fluorescent-labeled pre-miR-200c (see Supplementary Materials and Methods) was incubated for 1 hr at 37°C in buffer (lane 1), or with beads bound to protein from uninduced or induced cells expressing active (lanes 2 and 3) or inactive (lanes 4 and 5) hPMR1 transgenes. The reaction products were separated on a 20% polyacrylamide/urea gel and visualized by LiCor. **D.** The experiment in **C** was repeated with forms of pre-miR-200c indicated in **A** with U at position 34 changed to A (U34A) or G at position 35 changed to C (G35C). These changes were shown previously to prevent cleavage by PMR1 (1). Based on results in **D** we suspect that the residual activity seen in **C** is due to carryover of endogenous hPMR1.

1) Chernokalskaya, E., Dompenciel, R.E. and Schoenberg, D.R. (1997) Cleavage properties of a polysomal ribonuclease involved in the estrogen-regulated destabilization of albumin mRNA. *Nucleic Acids Res.* 25, 735-742.

**Table S1. Primers used for RT-qPCR of hPMR1 and miR-200 target mRNAs**

| <b>Transcript</b> | <b>NCBI ID</b> | <b>Primer name</b>             | <b>Sequence</b>                                 |
|-------------------|----------------|--------------------------------|-------------------------------------------------|
| hPMR1             | NM 144651      | hPMR1 Forward<br>hPMR1 Reverse | TTGTAAAGGCAGAATACCCACA<br>CAGCTTGTTTACTGCACAGC  |
| RPLP0             | NM 001002      | RPLP0 Forward<br>RPLP0 Reverse | GGAGAAACTGCTGCCTCATATC<br>CAGCAGCTGGCACCTTATT   |
| ZEB1              | NM 030751.5    | ZEB1 Forward<br>ZEB1 Reverse   | GGCTCCTATAGCTCACACATAAG<br>TGCTGAAAGAGACGGTGAAG |
| ZEB2              | NM 013241.2    | ZEB2 Forward<br>ZEB2 Reverse   | AAGGTGTCAGAGGTGAAGGA<br>CAGGGCAGGGATTTCTGAATAG  |
| FHOD1             | NM 013241.2    | FHOD1 Forward<br>FHOD1 Reverse | GAAGAGCGGCAGAAGATTGA<br>AATGGAGGCAAGAGTCATCAG   |
| PPM1F             | NM 014634.3    | PPM1F Forward<br>PPM1F Reverse | ATTCTGCCAAGGCTCCAAG<br>CCGAGACGAACGCAGATAAA     |

**Table S2. Primers used to generate pre-miR-200c transcripts.** Shown are the DNA primers used for *in vitro* transcription to generate wild-type (WT) pre-miR-200c and cleavage site mutants. The locations of the TG dinucleotide cleavage site and each of the single base mutations are in red.

| Primer name       | Sequence                                                                           |
|-------------------|------------------------------------------------------------------------------------|
| Pre-miR-200c WT   |                                                                                    |
| Forward Primer    | 5'-GAAATTAATACGACTCACTATAGGGCCCTCGTCTTACCCAGCAGTGTTTGGGTGCGGT <b>TGGG</b> AGTCTCTA |
| Reverse primer    | 5'-CCTCCATCATTACCCGGCAGTATTAGAGACTCCCAACCGCACCCAAACAC                              |
| Pre-miR-200c U34A |                                                                                    |
| Forward Primer    | 5'-GAAATTAATACGACTCACTATAGGGCCCTCGTCTTACCCAGCAGTGTTTGGGTGCGGT <b>A</b> GGGAGTCTCTA |
| Reverse primer    | 5'-CCTCCATCATTACCCGGCAGTATTAGAGACTCC <b>T</b> ACCGCACCCAAACAC                      |
| Pre-miR-200c G35C |                                                                                    |
| Forward Primer    | 5'-GAAATTAATACGACTCACTATAGGGCCCTCGTCTTACCCAGCAGTGTTTGGGTGCGGT <b>C</b> GGAGTCTCTA  |
| Reverse primer    | 5'-CCTCCATCATTACCCGGCAGTATTAGAGACTCC <b>G</b> AACCGCACCCAAACAC                     |
